# ElectroEncephaloGraphy robust linear modelling using weights reflecting single trials' dynamics

Cyril Pernet<sup>1,2</sup>, Guillaume Rousselet<sup>3</sup>, Ignacio Suay Mas<sup>1</sup>,  
Ramon Martinez<sup>4</sup>, Rand Wilcox<sup>5</sup> & Arnaud Delorme<sup>4,6,7</sup>

<sup>1</sup> Centre for Clinical Brain Sciences, University of Edinburgh, United Kingdom, <sup>2</sup> Neurobiology Research Unit, Copenhagen University Hospital, Rigshospitalet, Denmark, <sup>3</sup> Centre for Cognitive Neuroimaging, Institute of Neuroscience and Psychology, University of Glasgow, United Kingdom, <sup>4</sup> Swartz Center for Computational Neurosciences, University of California, United States of America, <sup>5</sup> Department of Psychology, University of Southern California, United States of America, <sup>6</sup> Centre de Recherche Cerveau et Cognition, Université Toulouse III – Paul Sabatier, Toulouse, France, <sup>7</sup> Centre National de la Recherche Scientifique, Centre de Recherche Cerveau et Cognition, Toulouse, France

## Abstract

Being able to remove or weigh down the influence of outlier data is desirable for any statistical models. While Magnetic and ElectroEncephalographic (MEEG) data are often averaged across trials per condition, it is becoming common practice to use information from all trials to build linear models. Individual trials can, however, have considerable weight and thus bias inferential results. Here, rather than looking for univariate outliers, defined independently at each measurement point, we apply the principal component projection (PCP) method at each channel, deriving a single weight per trial at each channel independently. Using both synthetic data and open EEG data, we show (1) that PCP is efficient at detecting a large variety of outlying trials; (2) how PCP-based weights can be implemented in the context of the general linear model with accurate control of type 1 family-wise error rate; and (3) that our PCP-based Weighted Least Square (WLS) approach increases the statistical power of group analyses as well as a much slower Iterative Reweighted Least Squares (IRLS), although the weighting scheme is markedly different. Together, our results show that WLS based on PCP weights derived from whole trial profiles is an efficient method to weigh down the influence of outlier EEG data in linear models.

**Keywords:** ElectroEncephaloGraphy, single trials, Weighted Least Squares, General Linear Model 38 39

**Data availability:** all data used are publicly available (CC0), all code (simulations and data 40 analyses) is also available online in the LIMO MEEG GitHub repository (MIT license).

## 41 Introduction

42  
43 MEEG data are often epoched to form 3 or 4-dimensional matrices of, e.g., channel x time x trials  
44 and channel x frequency x time x trials. Several neuroimaging packages are dedicated to the  
45 analyses of such large multidimensional data, often using linear methods. For instance, in the  
46 LIMO MEEG toolbox (Pernet et al., 2011), each channel, frequency, and time frame is analyzed  
47 independently using the general linear model, an approach referred to as mass-univariate  
48 analysis. Ordinary Least Squares (OLS) are used to find model parameters that minimize the error  
49 between the model and the data. For least squares estimates to have good statistical properties,  
50 it is however expected that the error covariance off-diagonals are zeros, such that  $\text{Cov}(e) = \sigma^2 I$ ,  $I$   
51 being the identity matrix (Christensen, 2002), assuming observations are independent and  
52 identically distributed. It is well established that deviations from that assumption lead to  
53 substantial power reduction and to an increase in the false-positive rate. When OLS assumptions  
54 are violated, robust techniques offer reliable solutions to restore power and control the false  
55 positive rate. Weighted Least Squares (WLS) is one such robust method that uses different  
56 weights across trials, such that  $\text{Cov}(e) = \sigma^2 V$ , with  $V$  a diagonal matrix:

$$57 \quad y = X\beta + e, \quad E(e) = 0, \quad \text{Cov}(e) = \sigma^2 V \quad \text{equation 1}$$

58  
59 with  $y$  a  $n$ -dimensional vector (number of trials),  $X$  the  $n \times p$  design matrix,  $\beta$  a  $p$  dimensional vector  
60 (number of predictors in  $X$ ) and  $e$  the error vector of dimension  $n$ . The WLS estimators can then  
61 be obtained using an OLS on transformed data (eq. 2 and 3):

$$62 \quad Wy = WX\beta + We, \quad E(e) = 0, \quad \text{Cov}(e) = \sigma^2 I \quad \text{equation 2}$$

$$63 \quad \hat{\beta} = (X^T WX)^{-1} X^T Wy \quad \text{equation 3}$$

64  
65 with  $W$  a  $1 \times n$  vector of weights.

66  
67  
68  
69 When applied to MEEG data, a standard mass-univariate WLS entails obtaining a weight for each  
70 trial but also each dimension analyzed, i.e. channels, frequencies and time frames. Following  
71 such procedure, a trial could be considered as an outlier or be assigned a low weight, for a single  
72 frequency or time frame, which is implausible given the well-known correlations of MEEG data  
73 over space, frequencies and time. We propose here that a single or a few consecutive data points  
74 should never be flagged as outliers or weighted down, and that a single weight per trial (and  
75 channel) should be derived instead, with weights taking into account the whole temporal or  
76 spectral profile. In the following, we demonstrate how the Principal Component Projection  
77 method (PCP - Filzmoser et al., 2008) can be used in this context, and how those weights can then  
78 be used in the context of the general linear model, applied here to event-related potentials.

## 79 Method

80

### 81 *Trial-based Weighted Least Squares*

82

83 An illustration of the method is shown in figure 1. Trial weights are computed as a distance among  
84 trials projected onto the main ( $\geq 99\%$ ) principal components space. Here, the principal  
85 components computed over the  $f$  time frames are those directions which maximize the variance  
86 across trials for uncorrelated (orthogonal) time periods (figure 1B). Outlier trials are points in the  
87  $f$ -dimensional space which are far away from the bulk. By virtue of the PCA, these outlier trials  
88 become more visible along the principal component axes than in the original data space. Weights  
89 (figure 1E) for each trial are obtained using both the Euclidean norm (figure 1C, distance location)  
90 and the kurtosis weighted Euclidean norm (figure 1D, distance scatter) in this reduced PCA space  
91 (see Filzmoser et al., 2008 for details). We exploit this simple technique because it is  
92 computationally fast given the rich dimensional space of EEG data and because it does not  
93 assume the data to originate from a particular distribution. The only constraint is that there are  
94 more trials present than time frames. For instance, with trials ranging from -50 ms to +650 ms,  
95 sampled at 250 Hz (thus 176 time points), the method requires at least 177 trials. The PCP  
96 algorithm is implemented in the *limo\_pcout.m* function, distributed with the LIMO MEEG toolbox  
97 ([https://limo-eeg-toolbox.github.io/limo\\_meeg/](https://limo-eeg-toolbox.github.io/limo_meeg/)). The WLS solution, implemented in  
98 *limo\_WLS.m*, consists of computing model beta estimates using weights from the PCP method  
99 on OLS standardized robust residuals, following three steps:

100

- 101 (1) After the OLS solution is computed, an adjustment is performed on residuals by  
102 multiplying them by  $1/\sqrt{1-h}$  where  $h$  is a vector of Leverage points (i.e. the diagonal of  
103 the hat matrix  $H = X(X'X)^{-1}X'$  where  $X$  is the design matrix). This adjustment is  
104 necessary because leverage points are the most influential on the regression space, i.e.  
105 they tend to have low residual values (Hoaglin & Welsch, 1978).
- 106 (2) Residuals are then standardized using a robust estimator of dispersion, the median  
107 absolute deviation to the median (MAD), and re-adjusted by the tuning function. Here we  
108 used the bisquare function. The result is a series of weights with high weights for data  
109 points having high residuals (with a correction for Leverage).
- 110 (3) The WLS solution is then computed following equation 3.

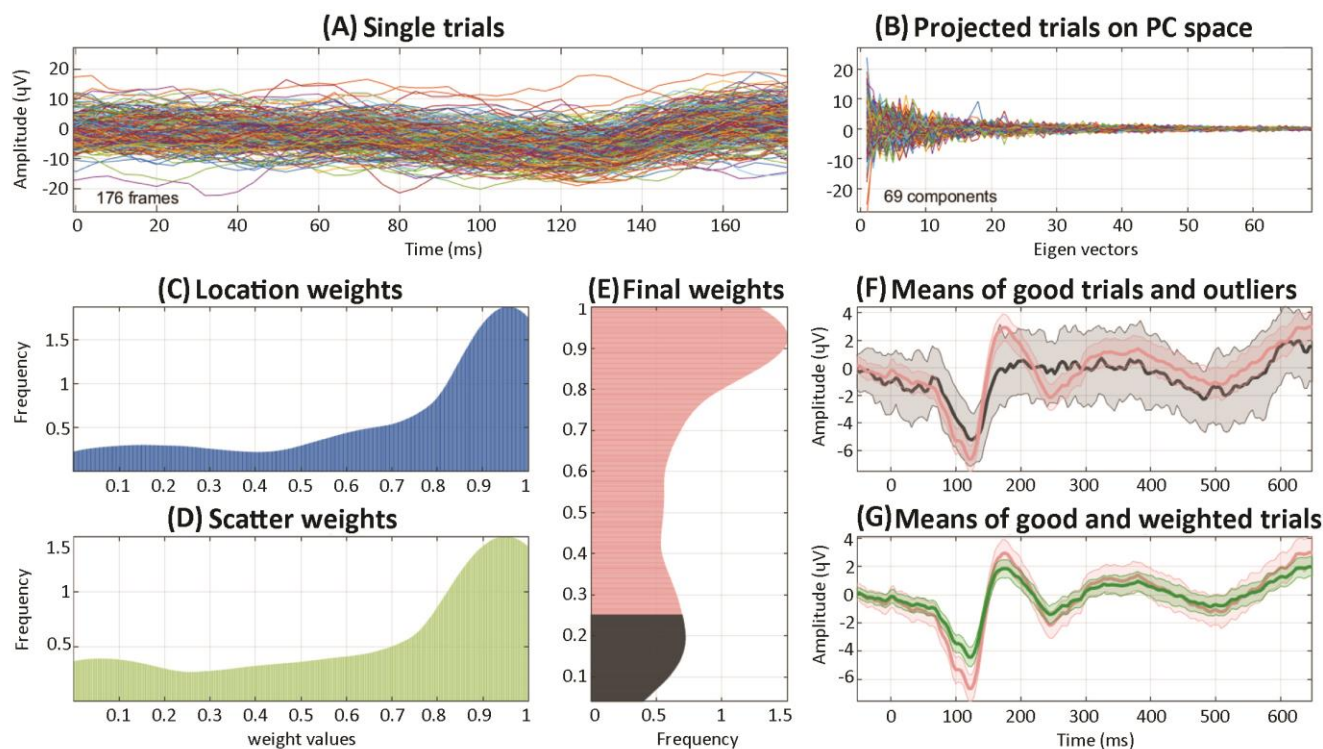

111  
 112 *Figure 1. Illustration of the PCP weighting scheme using trials for ‘famous faces’ of the OpenNeuro.org*  
 113 *publicly available ds002718 dataset. Data are from subject 3, channel 34 (see Section on empirical data*  
 114 *analysis). Panel A shows the single-trial responses to all stimuli. The principal component analysis is*  
 115 *computed over time, keeping the components explaining the most variance and summing to at least 99%*  
 116 *of explained variance (giving here 69 eigenvectors i.e. independent time components from the initial 176*  
 117 *time points). The data are then projected onto those axes (panel B). From the data projected onto the*  
 118 *components, Euclidean distances for location and scatter are computed (panels C, D - showing smooth*  
 119 *histograms of weights) and combined to obtain a distance for each trial. That distance is either used as*  
 120 *weights in a linear model or used to determine outliers (panel E, with outliers identified for weights below*  
 121 *~0.27, shown in dark grey). At the bottom right, the mean ERP for trials classified as good (red) vs. outliers*  
 122 *(black) and the weighted mean (green) are shown (panels F and G). Shaded areas indicate the 95% highest-*  
 123 *density percentile bootstrap intervals.*

124  
 125 *Simulation-based analyses*

126  
 127 *A. Outliers detection and parameters estimation.*

128  
 129 Simulated ERPs were generated to evaluate the classification accuracy of the PCP method and to  
 130 estimate the robustness to outliers and low signal-to-noise ratio of the WLS solution in  
 131 comparison to an OLS solution and a standard Iterative Reweighted Least Squares (IRLS) solution,  
 132 which minimizes residuals at each time frame separately (implemented in *limo\_IRLS.m*). To do  
 133 so, we manipulated (i) the percentage of outliers, using 10%, 20%, 30%, 40% or 50% of outliers;  
 134 (ii) the signal to noise ratio (defined relative to the mean over time of the background activity);  
 135 and (iii) the type of outliers. The first set of outliers were defined based on the added noise: white  
 136 noise, pink noise, alpha oscillations and gamma oscillations. In these cases, the noise started with

137 the P1 component and lasted ~ 200ms (see below). The second set of outliers were defined based  
138 on their amplitude, or outlier to signal ratio (0.5, 0.8, 1.2, and 1.5 times the true N1 amplitude).

139  
140 Synthetic data were generated for one channel, using the model developed by Yeung et al.  
141 (2018). The simulated signal corresponded to an event-related potential with P1 and N1  
142 components (100 ms long) added to background activity with the same power spectrum as  
143 human EEG, generating 200 trials of 500 ms duration with a 250 Hz sampling rate. Examples for  
144 each type of simulation are shown in figure 2 and results are based, for each case, on a thousand  
145 random repetitions. Performance of the PCP algorithm at detecting outlying synthetic EEG trials  
146 was investigated by computing the confusion matrix and mapping the true and false positives  
147 rates in the Receiver Operating space, and by computing the Matthew Correlation Coefficients  
148 (MCC). Robustness was examined by computing the Pearson correlations and the Kolmorov-  
149 Smirnov (KS) distances between the ground truth mean and the OLS, WLS, and IRLS means.  
150 Pearson values allowed to estimate the linear relationships between estimated means and the  
151 truth while KS distances provide a fuller picture of the overall differences in distributions.

152  
153 The code used to generate the ERP and the results are available at [https://github.com/LIMO-EEG-Toolbox/limo\\_test\\_stats/tree/master/PCP\\_simulations](https://github.com/LIMO-EEG-Toolbox/limo_test_stats/tree/master/PCP_simulations).  
154



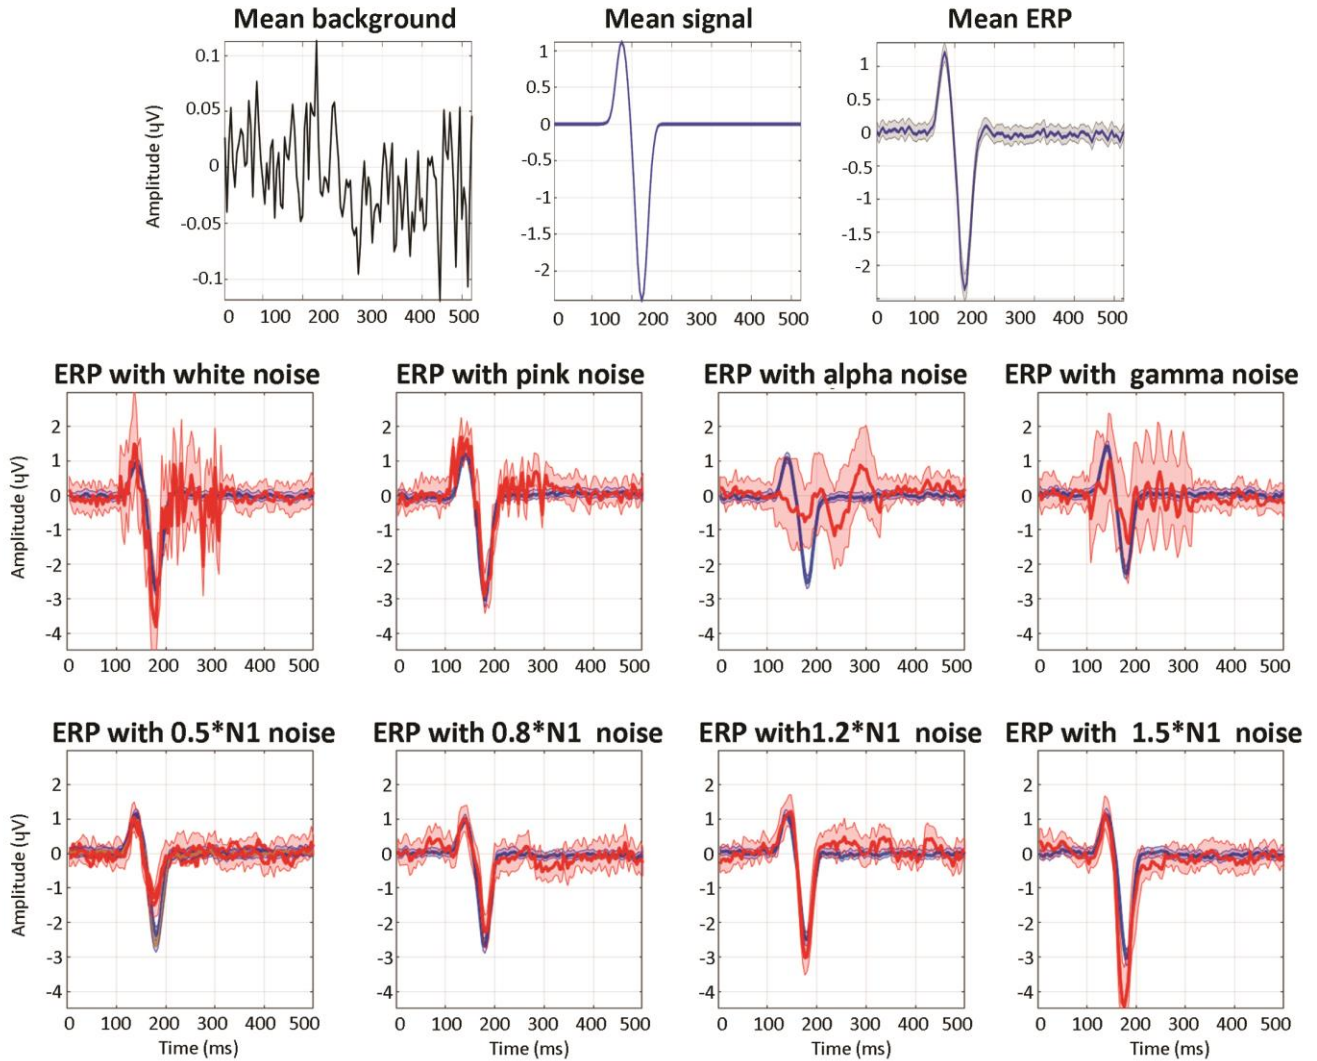

155  
 156 *Figure 2. Illustration of simulated ERP ground truth with the different types of outlier trials. At the top is*  
 157 *shown the mean background, mean signal and resulting generated ERP with its 95% confidence intervals.*  
 158 *In each subsequent subplot is shown the mean ERP ground truth from 160 trials with their 95% confidence*  
 159 *intervals (blue) with a SNR of 1. The first row shows in red the mean ERP from outlier trials generated by*  
 160 *adding white noise, pink noise, alpha or gamma oscillations; the second row shows the mean ERP from*  
 161 *outlier trials generated with variable Outlier to Signal Ratio (OSR) on the N1 component.*

162  
 163 **B. Statistical inference.**

164  
 165 Accurate estimation of model parameters (i.e. beta estimates in the GLM - equation 3) is  
 166 particularly important because it impacts group-level results. Inference at the single-subject level  
 167 may, however, also be performed and accurate p-values need, therefore, to be derived. Here,  
 168 error degrees of freedom are obtained using the Satterthwaite approximation (equation 4).

169  
 170 
$$dfe = \text{tr}([I - H]^T [I - H]) \quad \text{equation 4}$$

171  
 172 *with dfe, the degree of freedom of the error, I the identity matrix, and H the hat matrix.*

173 To validate p-values, simulations under the null were performed. Two types of data were  
174 generated: Gaussian data of size 120 trials x 100 time frames and EEG data of size 120 trials x 100  
175 time frames with a P1 and N1 component as above, added to coloured background activity with  
176 the same power spectrum as human EEG. In each case, a regression (1 Gaussian random  
177 variable), an ANOVA (3 conditions of 40 trials - dummy coding) and an ANCOVA (3 conditions of  
178 40 trials and 1 Gaussian random covariate) model were fitted to the data using the OLS, WLS and  
179 IRLS methods. The procedure was performed 10,000 times, leading to 1 million p-values per  
180 data/model/method combination and Type 1 errors with binomial confidence intervals were  
181 computed.

182

### 183 *Empirical data analysis*

184

185 A second set of analyses used the publicly available multimodal face dataset (Wakeman &  
186 Henson, 2016) to (i) investigate the PCP classification; (ii) validate the GLM implementation for  
187 type 1 error family-wise control at the subject level; (iii) evaluate group results, contrasting WLS  
188 against the OLS and IRLS methods. This analysis can be reproduced using the script available at  
189 [https://github.com/LIMO-EEG-  
190 Toolbox/limo\\_meeg/blob/master/resources/code/Method\\_validation.m](https://github.com/LIMO-EEG-Toolbox/limo_meeg/blob/master/resources/code/Method_validation.m).

191

#### 192 *A. EEG Data and Preprocessing*

193

194 The experiment consisted in the presentation of familiar, unfamiliar, and scrambled faces,  
195 repeated twice at various intervals, leading to a factorial 3 (type of faces) by 3 (repetition) design.  
196 The preprocessing replicated Pernet et al (2021). EEG data were extracted from the MEG fif files,  
197 time corrected and electrode position re-oriented and saved according to EEG-BIDS (Pernet et  
198 al., 2019 - available at [OpenNeuro 10.18112/openneuro.ds002718.v1.0.2](https://openneuro.org/datasets/10.18112/openneuro.ds002718.v1.0.2)). Data were imported  
199 into EEGLAB (Delorme & Makeig, 2004) using *the bids-matlab-tools v5.2 plug-in* and non-EEG  
200 channel types were removed. Bad channels were next automatically removed and data filtered  
201 at 0.5 Hz using *pop\_clean\_rawdata.m* of the *clean\_radata* plugin v2.2 (transition band [0.25  
202 0.75], bad channel defined as a flat line of at least 5 sec and with a correlation to their robust  
203 estimate based on other channels below 0.8). Data were then re-referenced to the average  
204 (*pop\_reref.m*) and submitted to an independent component analysis (Onton et al., 2006)  
205 (*pop\_runica.m* using the runica algorithm sphering data by the number of channels -1). Each  
206 component was automatically labelled using the *ICLabel* v1.2.6 plug-in (Pion-Tonachini et al.,  
207 2019), rejecting components labeled as eye movements and muscle activity above 80%  
208 probability. Epochs were further cleaned if their power deviated too much from the rest of the  
209 data using the Artifact Subspace Reconstruction algorithm (Kothe & Makeig, 2013)  
210 (*pop\_clean\_rawdata.m*, burst criterion set to 20).

211

#### 212 *B. High vs. low weight trials and parameters estimation.*

213

214 At the subject level (1st level), ERP were modelled at each channel and time frame with the 9  
215 conditions (type of faces x repetition) and beta parameter estimates obtained using OLS, WLS,  
216 and IRLS. For each subject, high vs. low weight trials were compared with each other at the

217 channel showing the highest between trials variance to investigate what ERP features drove the  
218 weighting schemes. High and low trials were defined a priori as trials with weights (or mean  
219 weights for IRLS) below the first decile or above the 9th decile. We used a two-sample bootstrap  
220 t method to compare the 20% trimmed means of high and low trials in every participant, for each  
221 of these three quantities: temporal SNR (the standard deviation over time); global power (mean  
222 of squared absolute values, Parseval's theorem); autocorrelation (distance between the 2 first  
223 peaks of the power spectrum density, Wiener-Khinchin theorem). A similar analysis was  
224 conducted at the group level averaging the metrics across trials. Computations of the three  
225 quantities have been automatized for LIMO MEEG v3.0 in the *limo\_trialmetric.m* function.

226

### 227 *C. Statistical inference.*

228

229 In mass-univariate analyses, once p-values are obtained, the family-wise type 1 error rate can be  
230 controlled using the distribution of maxima statistics from data generated under the null  
231 hypothesis (Pernet et al., 2015). Here, null distributions were obtained by first centering data per  
232 conditions, i.e. the mean is subtracted from the trials in each condition, such that these  
233 distributions had a mean of zero, but the shape of the distributions is unaffected. We then  
234 bootstrap these centred distributions (by sampling with the replacement), keeping constant the  
235 weights (since they are variance stabilizers) and the design. We computed 2500 bootstrap  
236 estimates per subject. A thousand of these bootstrap estimates were used to compute the family-  
237 wise type 1 error rate (FWER), while maxima and cluster maxima distributions were estimated  
238 using from 300 to 1,500 bootstraps estimates in steps of 300, to determine the convergence  
239 rate, i.e. the number of resamples needed to control the FWER. Since OLS was already validated  
240 in Pernet et al. (2015), here we only present WLS results. Statistical validations presented here  
241 and other statistical tests implemented in the LIMO MEG toolbox v3.0 (GLM validation, robust  
242 tests, etc.) are all available at [https://github.com/LIMO-EEG-Toolbox/limo\\_test\\_stats/wiki](https://github.com/LIMO-EEG-Toolbox/limo_test_stats/wiki).

243

### 244 *D. Performance evaluation at the group level.*

245

246 At the group level (2nd level), we computed 3 by 3 repeated measures ANOVAs (Hotelling  $T^2$   
247 tests) separately on OLS, WLS, and IRLS estimates, with the type of faces and repetition as factors.  
248 Results are reported using both a correction for multiple comparisons with cluster-mass and with  
249 TFCE (threshold-free cluster enhancement) at  $p < .05$  (Maris & Oostenveld, 2007; Pernet et al.,  
250 2015).

251

252 In addition to these thresholded maps, distributions were compared to further understand where  
253 differences originated from. First, we compared raw effect sizes (Hotelling  $T^2$ ) median  
254 differences between WLS vs. OLS and WLS vs. IRLS for each effect (face, repetition and  
255 interaction), using a percentile t-test with alpha adjusted across all 6 tests using Hochberg's step-  
256 up procedure (Hochberg, 1988). This allowed checking if differences in results were due to effect  
257 size differences. Then, since multiple comparison correction methods are driven by the data  
258 structure, we compared the shapes of the F value and of the TFCE value distributions (TFCE  
259 reflecting clustering). Each distribution was standardized (equation 5) and WLS vs. OLS and WLS  
260 vs. IRLS distributions compared at multiple quantiles (Rousset et al., 2017).



261

$$262 \quad Y_{zi} = \frac{(Y_i - \text{median}(Y))}{\sqrt{(p_i/2) * \text{MAD}(Y)}} \quad \text{equation 5}$$

263

264 *with  $Y_{zi}$  the standardized data,  $Y$  the data, and  $\text{MAD}$  the median absolute deviation.*

265

## 266 **Results**

267

### 268 *Outliers detection*

269

270 While the PCP method is used in the GLM to obtain weights and not to remove outliers directly,  
271 simulations allowed us to better understand what kind of trials are weighted down and how good  
272 the method is at detecting such trials. Figure 3 shows all the results for ERP simulated with a SNR  
273 of 1. Similar results were observed when using a SNR of 2 (supplementary figure 1). First and  
274 foremost, in all cases and for up to 40% of outlying trials, the PCP data are located in the upper  
275 left corner of the ROC space, indicating good performances. When reaching 50% of outliers, the  
276 true positive rate falls down to ~40% and the false positive rate remains below 40%. This is best  
277 appreciated by looking at the plots showing perfect control over false positives when data are  
278 contaminated with up to 40% of white, alpha, and gamma outliers. In those cases, the Matthew  
279 Correlation Coefficients also remain high (>0.6) although not perfect (not =1), indicating some  
280 false negatives. Compared with other types of noise, pink noise elicited very different results,  
281 with Matthew Correlation Coefficients around 0 indicating chance classification level. Results  
282 from amplitude outliers also show Matthew Correlation Coefficients close to 0 with a linear  
283 decrease in true positives and a linear increase in false positives as the percentage of outliers  
284 increases. This implies that the PCP method did not detect amplitude changes around peaks.  
285 These results are simply explained by the principal components being computed over time  
286 frames, and outliers with pink noise and weaker or stronger N1 do not affect the temporal profile  
287 of the ground truth sufficiently to lead to different eigenvectors ('directions') in this dimension  
288 when decomposing the covariance matrix, i.e. their temporal profiles do not differ from the  
289 ground truth.

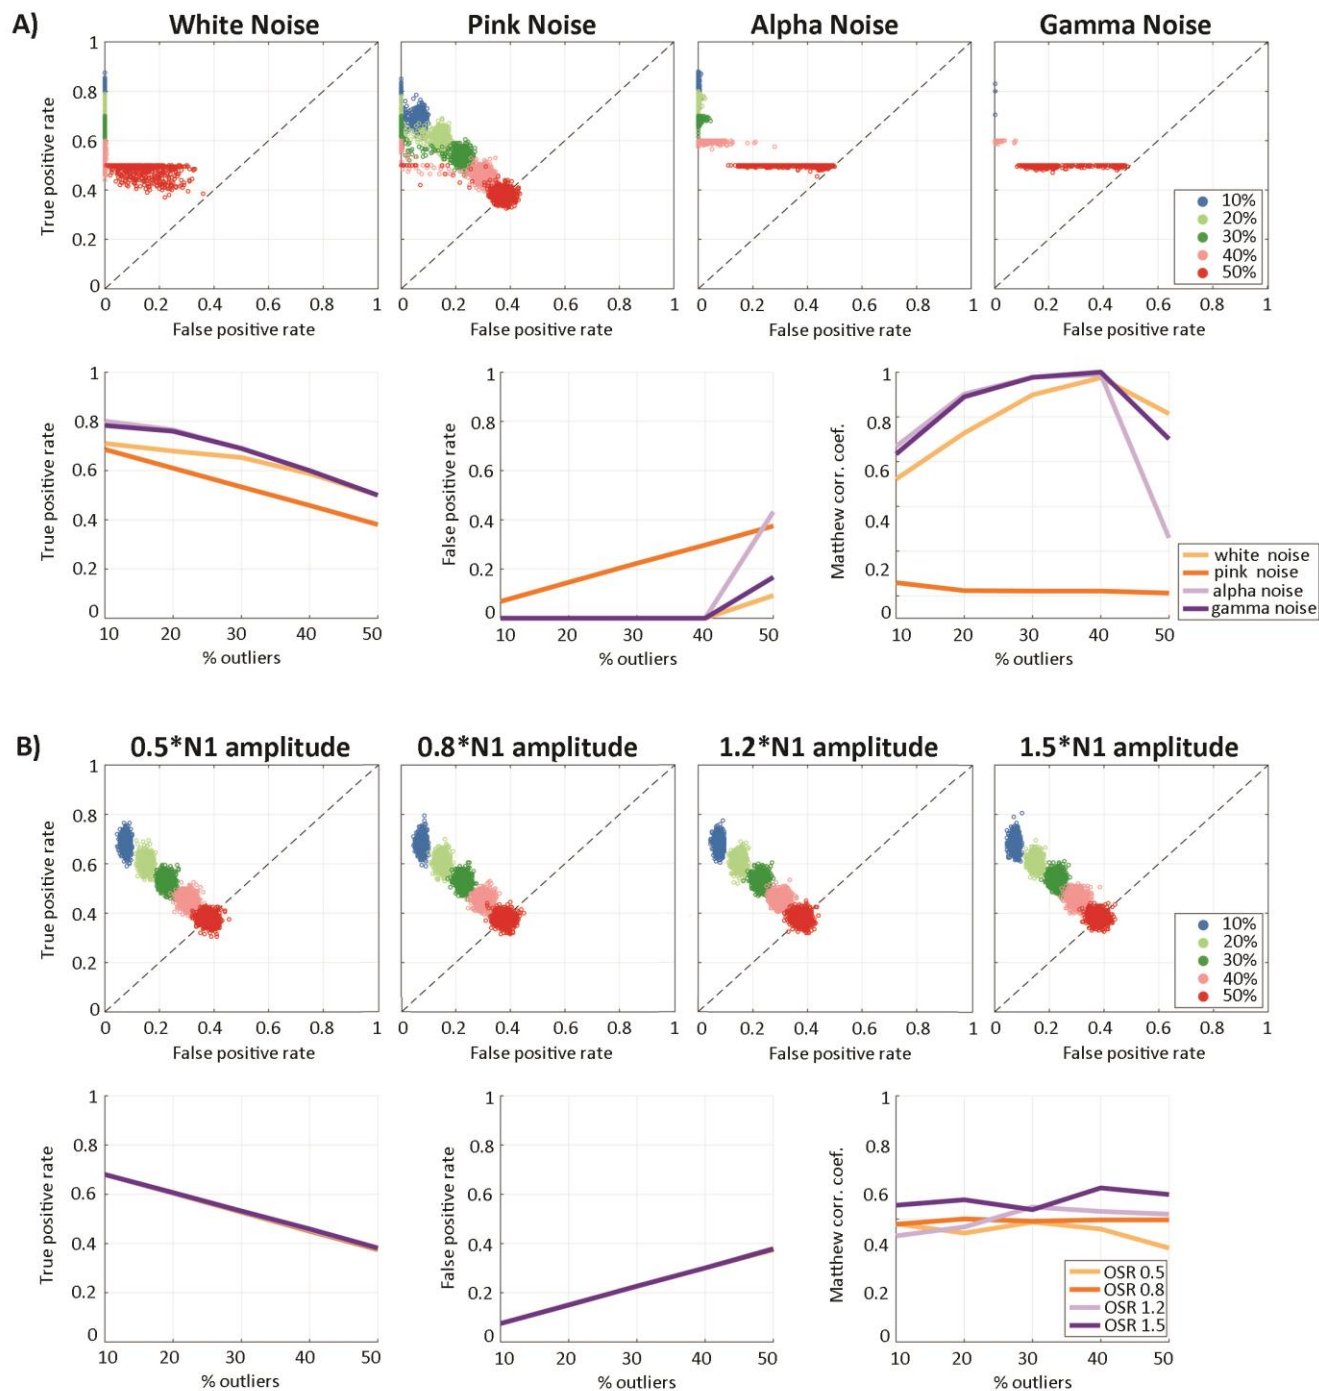

290  
 291 *Figure 3. PCP performance at detecting outlying trials with a SNR of 1. (A) Results for outliers affected by*  
 292 *white noise, pink noise, alpha, and gamma oscillations. (B) Results for trials affected by amplitude changes*  
 293 *over the N1 component (0.5, 0.8, 1.2, 1.5 times the N1). The scatter plots map the Receiver Operating*  
 294 *Characteristic Space (False Positive rate vs. True Positive rate); the curves display, from left to right, the*  
 295 *median True Positive rate, False Positive rate, and Matthew Correlation Coefficients.*  
 296

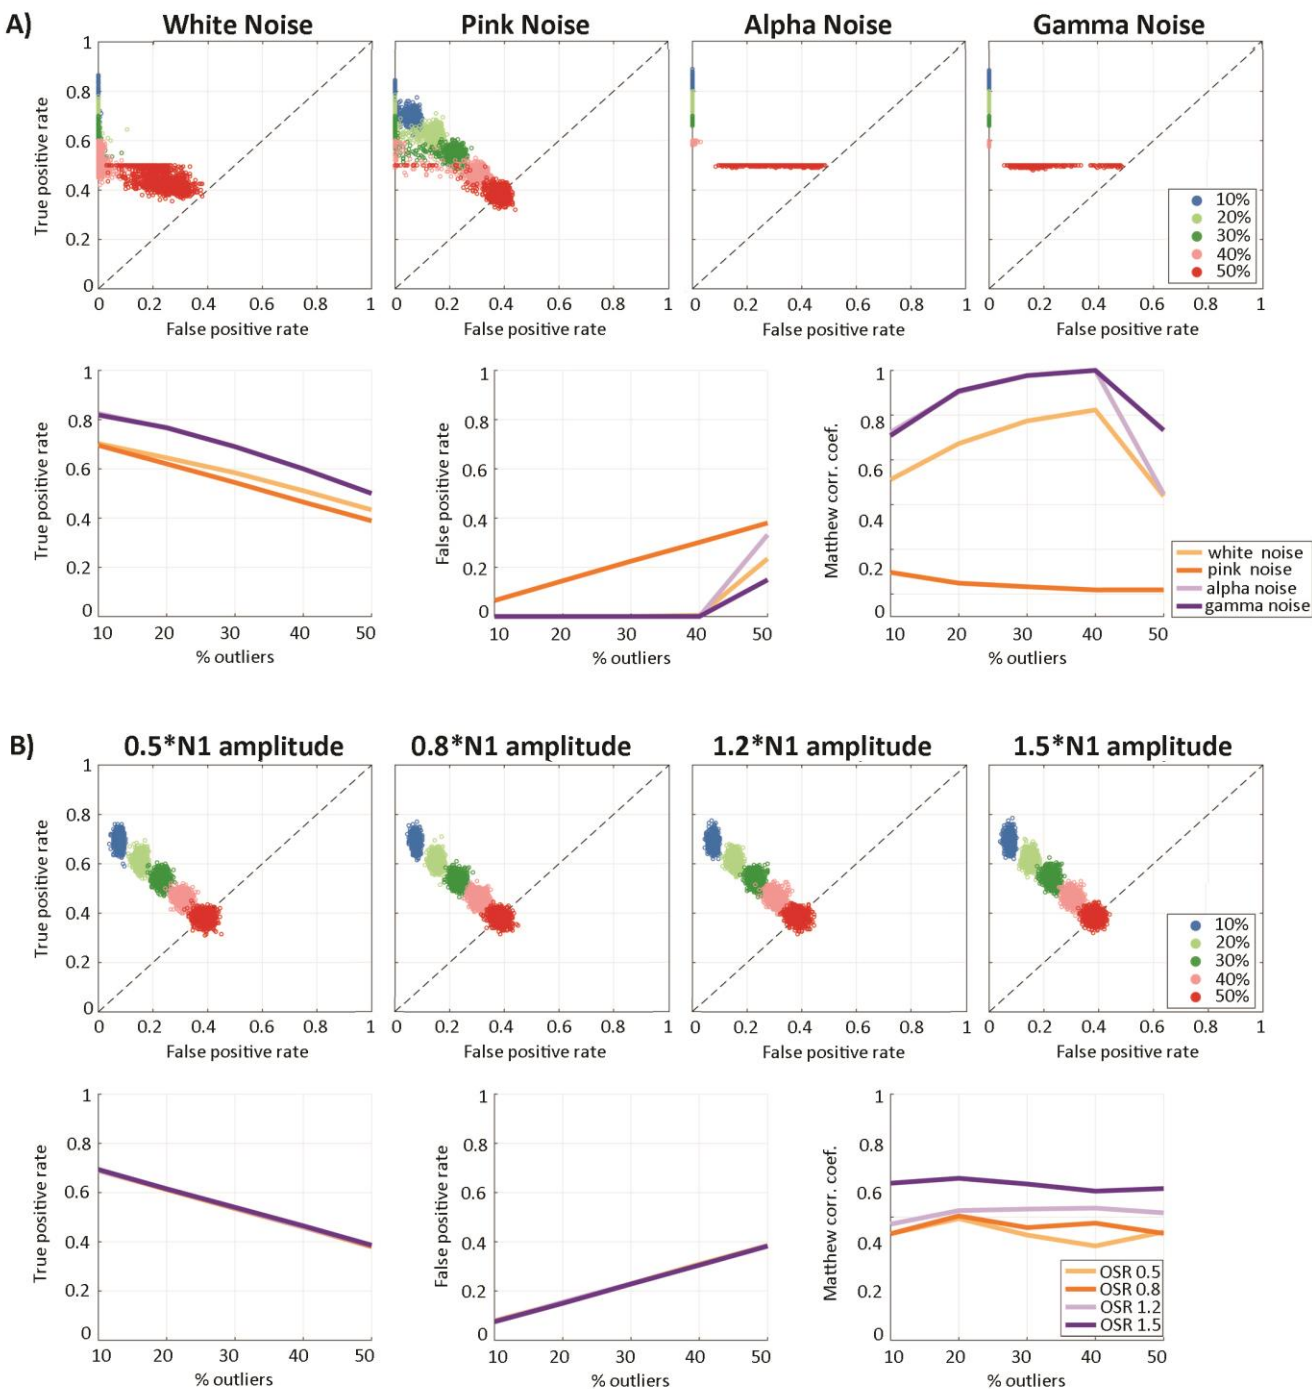

297  
 298 *Supplementary Figure 1. PCP performance at detecting outlying trials with a SNR of 2. (A) Results for outliers affected*  
 299 *by white noise, pink noise, alpha, and gamma oscillations. (B) Results for trials affected by amplitude changes over*  
 300 *the N1 component (0.5, 0.8, 1.2, 1.5 times the N1). The scatter plots map the Receiver Operating Characteristic Space*  
 301 *(False Positive rate vs. True Positive rate); the curves display, from left to right, the median True Positive rate, False*  
 302 *Positive rate, and Matthew Correlation Coefficients.*

303 *High vs. low trial weights*

304  
305 The classification for real ERP data confirmed the simulation results: the PCP algorithm weighted  
306 down trials with dynamics different from the bulk. Single subject analyses (supplementary table  
307 1) and group analyses (figure 4) for WLS showed that trials with a low weight are less smooth  
308 than trials with a high weight (higher temporal variance  $\sim 10$  vs. 7.26  $\mu\text{V}$  and power  $\sim 131$  vs. 69  
309 dB, lower autocorrelation 11 vs. 12.25 ms), despite having similar spectra (as expected from data  
310 filtering and artefact reduction). In comparison, trials with low and high mean weights based on  
311 IRLS, were similar on those metrics (temporal variance  $\sim 9$  vs. 7  $\mu\text{V}$ , and power  $\sim 126$  vs. 65 dB,  
312 autocorrelation 12.25 vs. 12 ms). While 11 out of 18 subjects show maximum between-trial  
313 variance on the same channels for WLS and IRLS, only 28% of low weight trials were the same  
314 between the two methods, and 56% of high weight trials. Since different trials have low or even  
315 high weights between methods, this further indicates that the weighting scheme from WLS  
316 differs from IRLS which relies on amplitude variations only.

317  
318 *Estimation and Robustness*

319  
320 The effect of adding outliers on the mean can be seen in figure 5 and supplementary figure 2.  
321 The standard mean, i.e. the ordinary least squares ERPs, shows an almost linear decrease in  
322 Pearson correlations and linear increase in KS distances to the ground truth as the percentage of  
323 outlier increases, an expected behaviour since OLS are not robust. Our reference robust  
324 approach, IRLS, shows robustness to white noise, alpha, and gamma oscillations with higher  
325 Pearson correlations than the OLS. Yet it performed worse than the OLS with pink noise and  
326 amplitude outliers, showing lower correlations with the ground truth, despite having similar KS  
327 distances in all cases. As the IRLS solution for pink noise and amplitude outliers weights data to  
328 minimize residuals at each time point separately, these are also expected results, resulting in an  
329 average distance (over time) larger than OLS. The new WLS approach showed stronger resistance  
330 to outliers for white noise, alpha and gamma oscillations than the IRLS approach, with higher  
331 Pearson correlations. For pink noise and N1 amplitude outliers, it performs as well as the IRLS,  
332 despite different KS distances. The IRLS algorithm attenuates the influence of those data points  
333 that differ from the ground truth, but this may be from different trials at different time points.  
334 By doing so, KS distances to the ground truth were similar or lower (for alpha and gamma  
335 oscillations) than the OLS. The WLS approach attenuates the influence of trials with different time  
336 courses and thus, the WLS ERP mean is affected at every time point, even if the detection  
337 concerns a small part of the time course, leading to higher KS distances even with a small number  
338 of outliers.



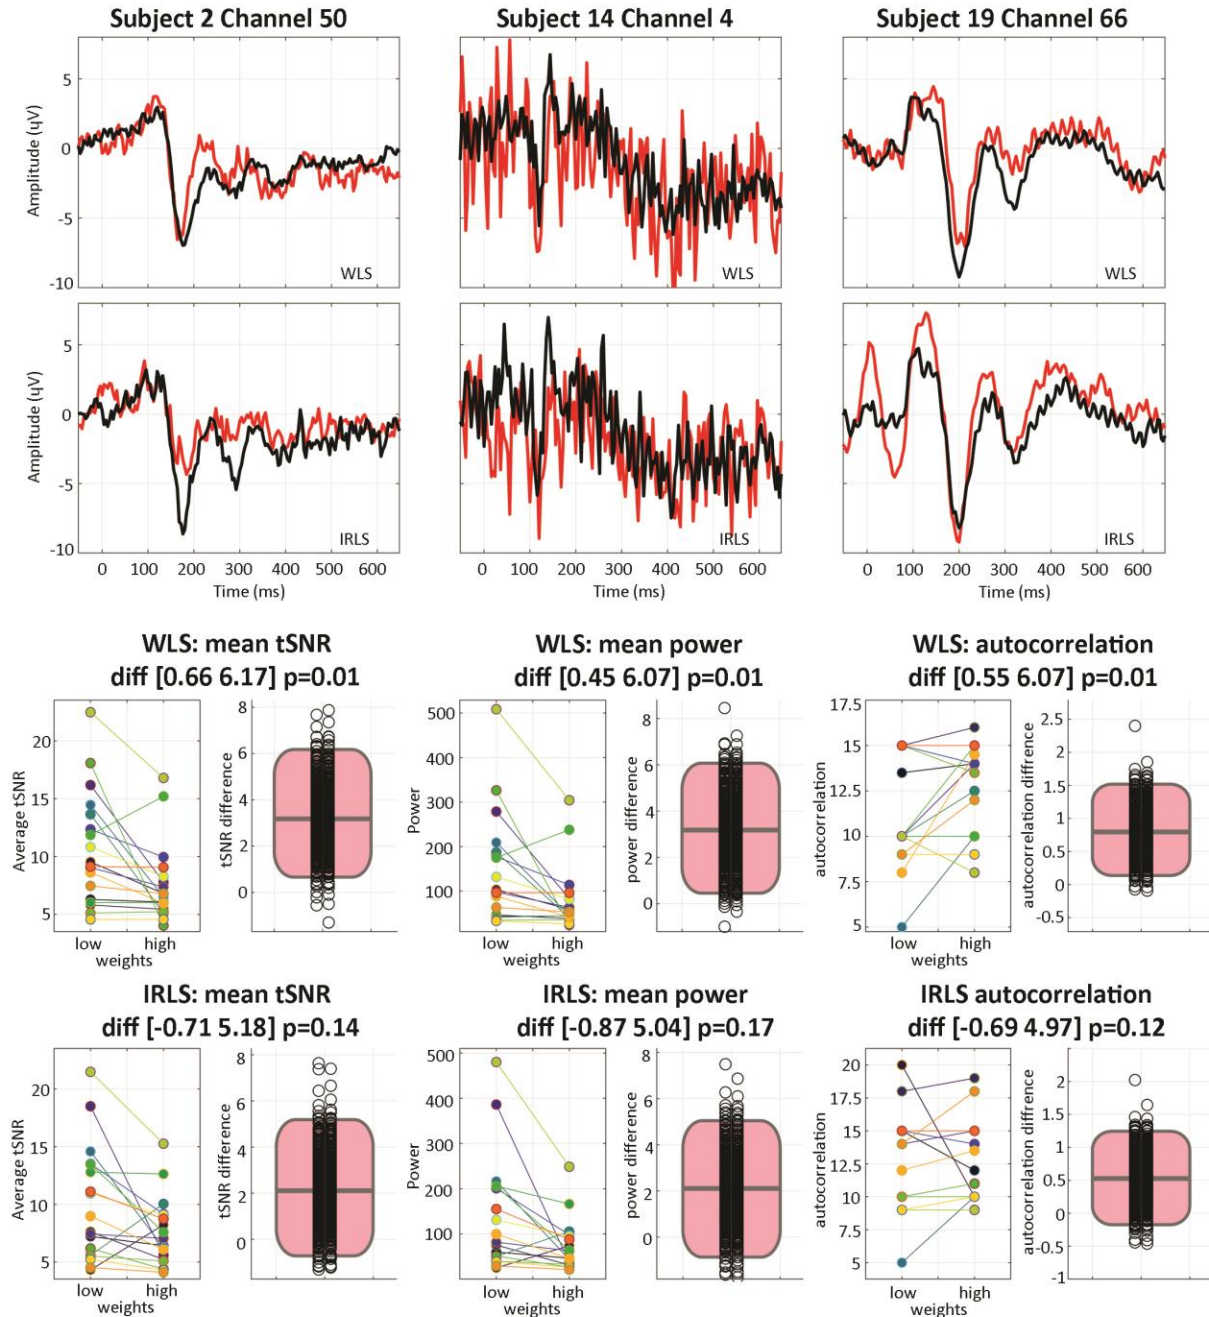

339  
340  
341  
342  
343  
344  
345  
346  
347

Figure 4. Face ERPs computed using low and high weight trials. The top of the figure displays the mean of low weight (red) and high weight (black) trials over right posterior temporal (subject 2, channel 50), left frontal (subject 14 channel 4), and left posterior central (subject 19, channel 66) areas. The weights were obtained either with the PCP-WLS or the IRLS methods. The lower part of the figure displays single subject mean tSNR, power and autocorrelation (scatter plots) along with the percentile bootstrap difference between low and high weight trials (black circles are the bootstrap 20% trimmed mean differences and the pink rectangles show the 20% trimmed mean and 95% confidence intervals).



|     | <i>t</i> SNR difference ( <i>uV</i> ) |               | Power difference ( <i>dB</i> ) |            | autocorrelation difference ( <i>ms</i> ) |               |
|-----|---------------------------------------|---------------|--------------------------------|------------|------------------------------------------|---------------|
|     | WLS                                   | IRLS          | WLS                            | IRLS       | WLS                                      | IRLS          |
| s2  | [-0.03 0.54]                          | [0.26 1.14]   | [-2 6]                         | [3 18]     | [-8.5 1.8]                               | [5.09 16.4]   |
| s3  | [2.35 2.92]                           | [-4.48 -2.34] | [35 50]                        | [-55 -22]  | [-3.9 3.5]                               | [16.6 45.9]   |
| s4  | [0.14 0.69]                           | [1.9 3.43]    | [1 13]                         | [39 64]    | [-13 -6.7]                               | [-12.8 3.2]   |
| s5  | [4.03 8.25]                           | [10.7 13.57]  | [77 200]                       | [297 382]  | [-13 -4.7]                               | [-14.6 -4.9]  |
| s6  | [1.51 2.87]                           | [-0.74 1.98]  | [24 48]                        | [-6 33]    | [-4.8 -0.39]                             | [-0.6 17.8]   |
| s7  | [1.16 5.1]                            | [2.44 5.26]   | [38 141]                       | [54 129]   | [-4 11.1]                                | [-7.3 11.2]   |
| s8  | [7.49 8.21]                           | [7.57 8.55]   | [154 173]                      | [159 183]  | [-24 -19.8]                              | [-20.2 -14.1] |
| s9  | [2.97 7.96]                           | [-4.55 0.44]  | [52 169]                       | [-74 28]   | [-16 -7.1]                               | [-1.5 7.1]    |
| s10 | [-0.61 0.9]                           | [-3.47 2.27]  | [-11 11]                       | [-107 102] | [0.9 9.1]                                | [-0.2 1.5]    |
| s11 | [-0.73 4.46]                          | [4.57 7.27]   | [-11 168]                      | [123 200]  | [-2.9 1.4]                               | [0 7.8]       |
| s12 | [6.69 11.17]                          | [-2.06 4.85]  | [149 250]                      | [-98 93]   | [-31 -22]                                | [-13.1 -2.7]  |
| s13 | [-5.06 0.1]                           | [-6.8 2.91]   | [-222 2]                       | [-285 142] | [4.4 12]                                 | [-6.2 0.19]   |
| s14 | [4.81 7.63]                           | [3.54 7.77]   | [174 270]                      | [123 270]  | [-0.4 24]                                | [-6.9 13.3]   |
| s15 | [1.69 3.91]                           | [-0.97 2.06]  | [36 93]                        | [-20 51]   | [-6.5 1.1]                               | [1.8 10.5]    |
| s16 | [-6.85 8.4]                           | [-2.13 13.82] | [-164 300]                     | [-65 444]  | [-8.3 8.7]                               | [-16 14.1]    |
| s17 | [2.34 3.72]                           | [2.31 4.09]   | [34 68]                        | [45 83]    | [-29.4 -15.9]                            | [-13.8 2.4]   |
| s18 | [0.54 1.28]                           | [-0.64 1.86]  | [6 20]                         | [-3 27]    | [-15.7 -2.43]                            | [-28.8 11.4]  |
| s19 | [-0.39 0.71]                          | [-0.40 0.57]  | [-8 16]                        | [-9 17]    | [-6.9 -1.3]                              | [-7.1 -1.5]   |

348 *Supplementary Table 1. Subjects 95% percentile bootstrap confidence intervals of 20% trimmed mean differences*  
 349 *between high and low trials obtained using PCP-WLS or IRLS at channels with the highest between-trial variance.*  
 350 *Intervals which do not include 0 (i.e., the difference between high vs. low trials is statistically significant) are shown*  
 351 *on a gray background.*

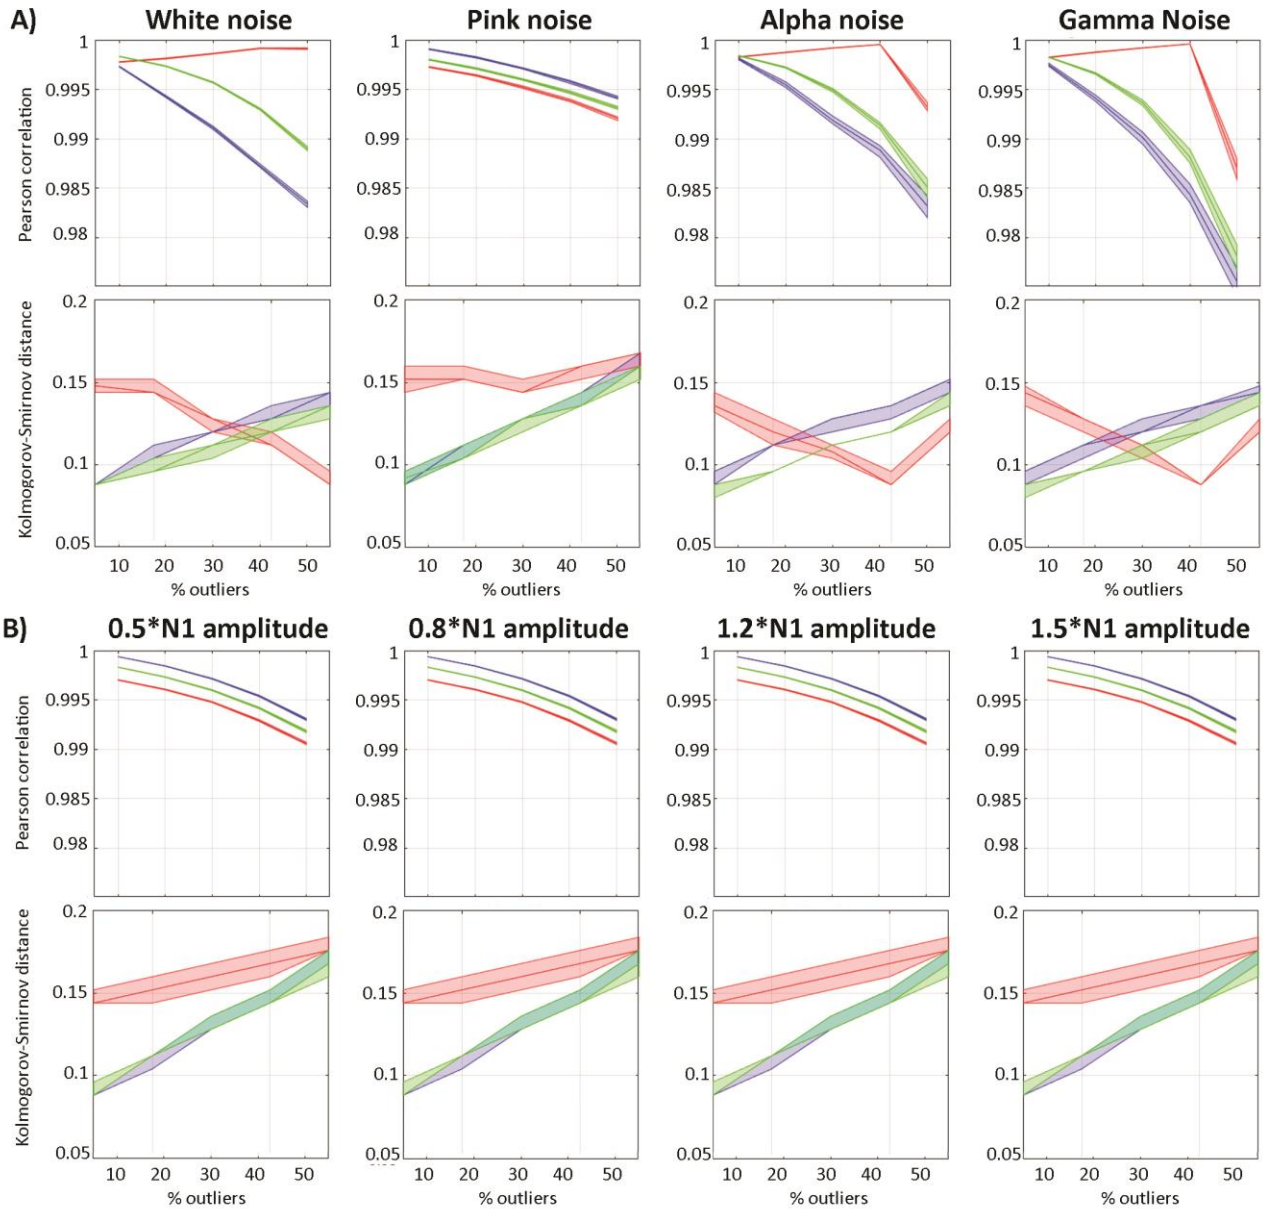

352  
353  
354  
355  
356  
357  
358  
359

*Figure 5. Robustness of the PCP method to outlying trials with a SNR of 1. The upper part of the figure shows median and 95% CI results for outliers affected by white noise, pink noise, alpha and gamma oscillations. The lower part of the figure shows results for trials affected by amplitude changes over the N1 component (0.5, 0.8, 1.2, 1.5 times the N1). Mean Pearson correlations indicate how similar the reconstructed means are to the ground truth, while mean Kolmogorov-Smitnov distances indicate how much the overall distribution of values differ from the ground truth. OLS is in blue, IRLS in green, WLS in red.*

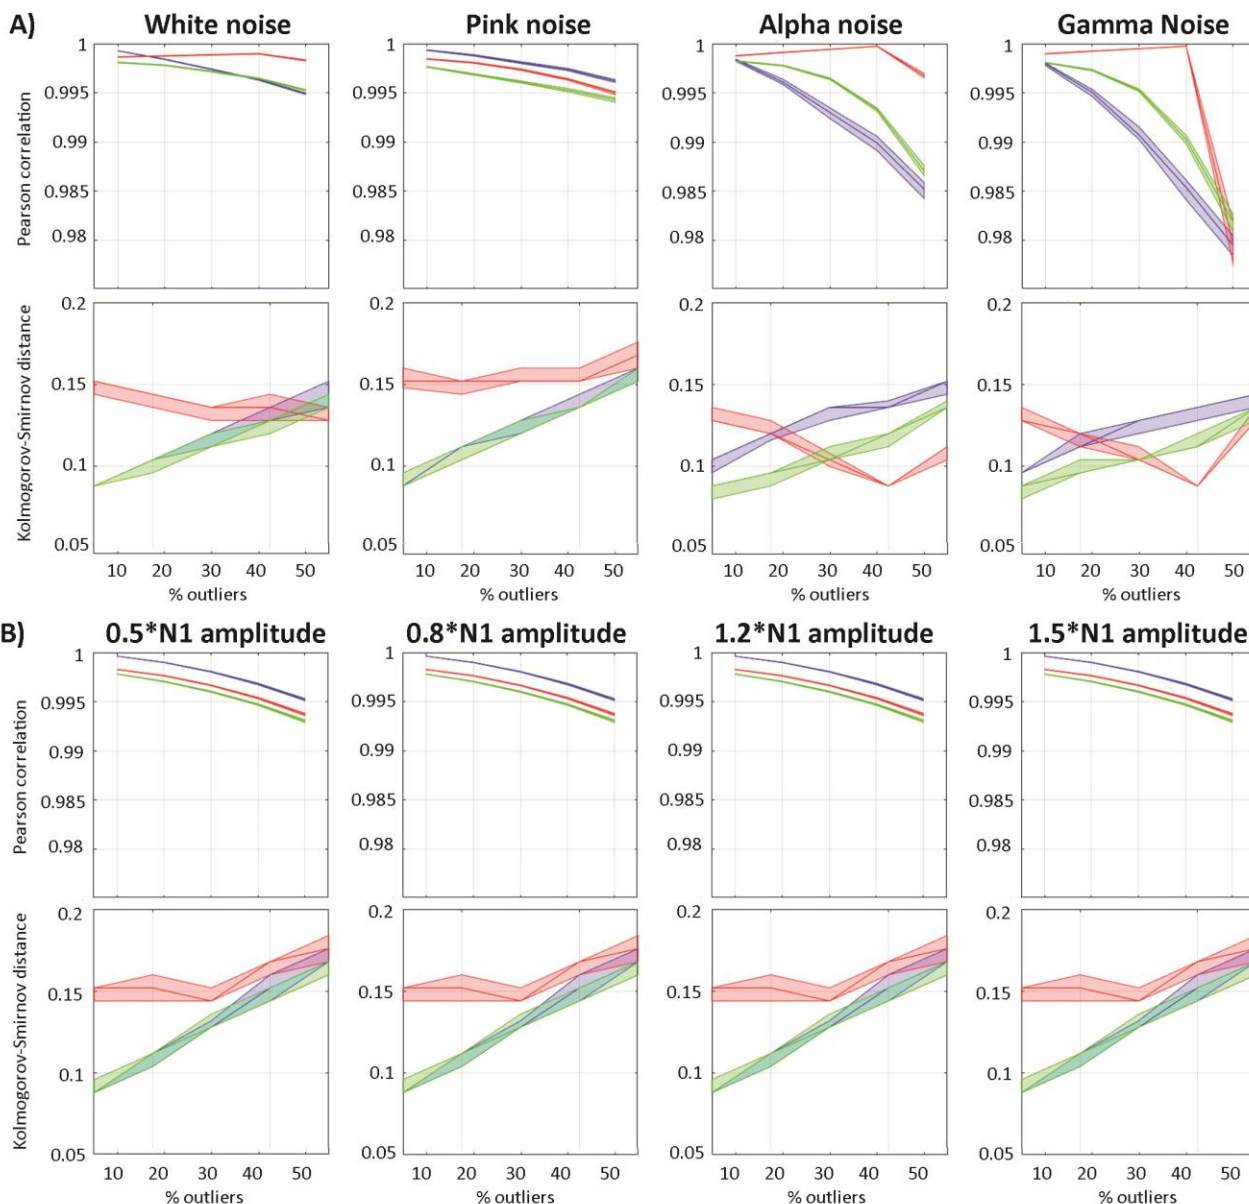

360  
361 *Supplementary figure 2. Robustness of the PCP method to outlying trials with a SNR of 2. The upper part*  
362 *of the figure shows median and 95% CI results for outliers affected by white noise, pink noise, alpha and*  
363 *gamma oscillations. The lower part of the figure shows results for trials affected by amplitude changes*  
364 *over the N1 component (0.5, 0.8, 1.2, 1.5 times the N1). Mean Pearson correlations indicate how similar*  
365 *the reconstructed means are to the ground truth, while mean Kolmogorov-Smitnov distances indicate how*  
366 *much the overall distribution of values differ from the ground truth. OLS is in blue, IRLS in green, WLS in*  
367 *red.*  
368

369 *Statistical inference for single subjects*

370  
 371 The average type 1 error rate for every channel and time frame tested with simulated data is at  
 372 the nominal level (5%) for OLS. Results also show that IRLS are a little lenient, with small but  
 373 significantly smaller p-values than expected, leading to an error rate of  $\sim 0.055$ . Conversely, WLS  
 374 are conservative for simulated ERP, with p-values slightly too high, giving a type 1 error rate of  
 375  $\sim 0.04$  and lenient with purely Gaussian data (type 1 error  $\sim 0.065$  – table 1). This behaviour of  
 376 WLS is caused by the PCP method which optimizes weights based on distances across time,  
 377 except that with simulated Gaussian data there is no autocorrelation and the PCA returns a much  
 378 higher number of dimensions, leading to a meaningless feature reduction and thus meaningless  
 379 trial distances and weights.

380

|                  |      | Null Gaussian   | Null ERP        |
|------------------|------|-----------------|-----------------|
| Regression       | OLS  | [0.0495 0.0503] | [0.0498 0.0507] |
|                  | WLS  | [0.0636 0.0645] | [0.0400 0.0408] |
|                  | IRLS | [0.0555 0.0564] | [0.0527 0.0536] |
| ANOVA            | OLS  | [0.0493 0.0502] | [0.0493 0.0501] |
|                  | WLS  | [0.0695 0.0706] | [0.0374 0.0382] |
|                  | IRLS | [0.0575 0.0584] | [0.0540 0.0549] |
| ANCOVA condition | OLS  | [0.0494 0.0502] | [0.0493 0.0502] |
|                  | WLS  | [0.0699 0.0709] | [0.0379 0.0386] |
|                  | IRLS | [0.0578 0.0587] | [0.0546 0.0555] |
| ANCOVA covariate | OLS  | [0.0496 0.0505] | [0.0496 0.0504] |
|                  | WLS  | [0.0638 0.0648] | [0.0410 0.0418] |
|                  | IRLS | [0.0563 0.0572] | [0.0538 0.0547] |

381 *Table 1. Type I error rate binomial 95% confidence intervals at every time frames and channels for*  
 382 *simulated data under the null hypothesis.*

383  
 384 The WLS family-wise type 1 error rate (i.e. controlling the error for statistical testing across the  
 385 whole data space) examined using nullified ERP data from Wakeman and Henson (2015) shows  
 386 a good probability coverage for both maximum and cluster statistics with 95% confidence  
 387 intervals overlapping with the expected nominal value (figure 6). Individual mean values ranged  
 388 from 0.039 to 0.070 for maximum statistics (across subject average 0.052) and 0.044 to 0.07 for  
 389 spatial-temporal clustering (across subject average 0.051). Those results do not differ  
 390 significantly from OLS results (paired bootstrap t-test). Additional analyses based on the number



391 of bootstraps used to build the null distribution indicate that 800 to a 1000 bootstrap samples  
 392 are enough to obtain stable results, and that the errors are relatively well distributed in space  
 393 and time even if some channels tend to be more affected than others, i.e. there is no strong  
 394 sampling bias: maximum number of error occurring at the same location was 0.05% using  
 395 maximum statistics and 0.9% using spatial-temporal clustering, see bottom for figure 6, error  
 396 density maps.  
 397

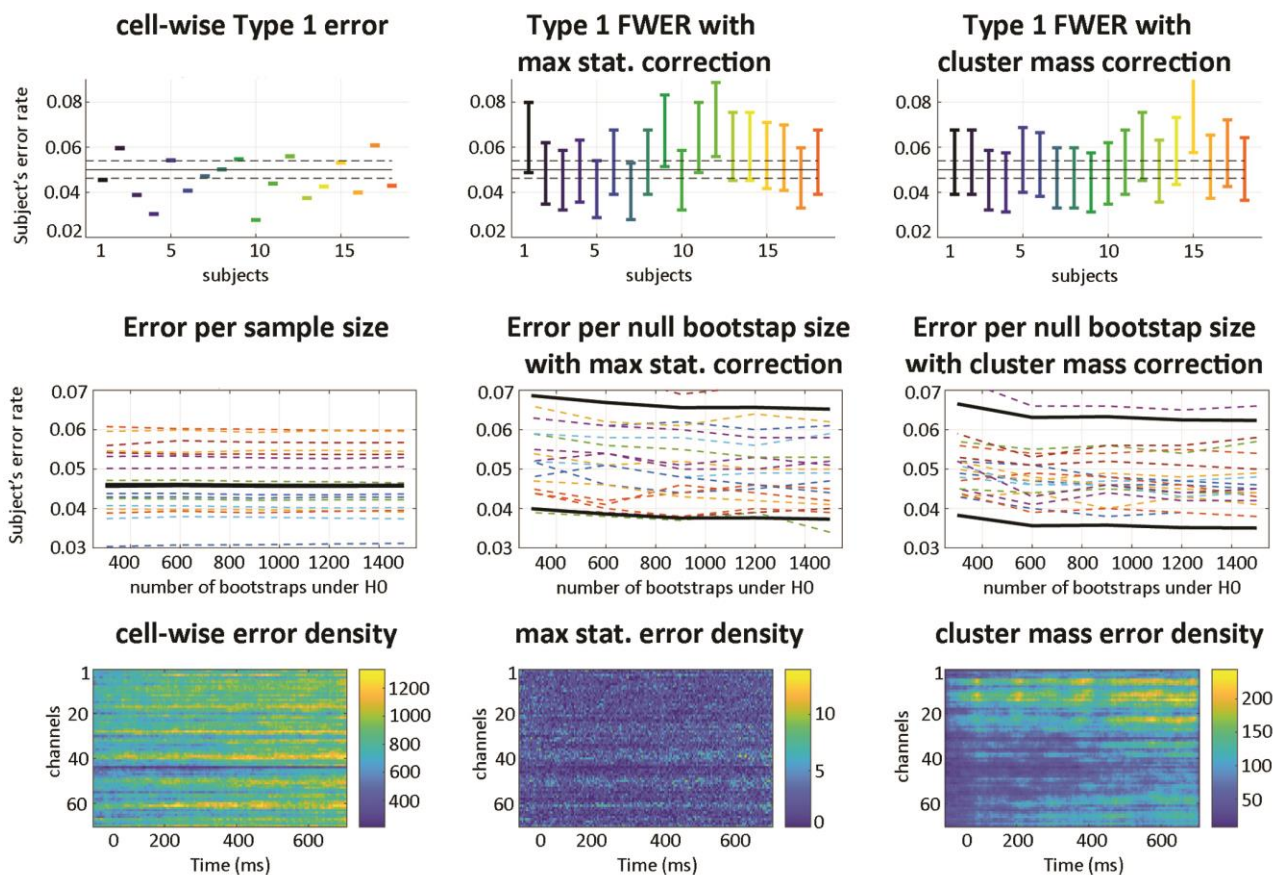

398  
 399 *Figure 6. Type 1 error rates under the null using the PCP-WLS method. The top row shows the subjects'*  
 400 *error rates: cell-wise, i.e. averaged across all time frames and channels, and corrected for the whole data*  
 401 *space, i.e. type 1 family wise error rate using either the distribution of maxima or the distribution of the*  
 402 *biggest cluster-masses. Results are within the expected range (marked by dotted black lines) with*  
 403 *overlapping 95% confidence intervals for maximum statistics and spatial-temporal clustering. The middle*  
 404 *row shows the effect of the number of resamples, with the dashed lines representing the boundaries of the*  
 405 *individual 95% average confidence intervals, and the black lines the average. The cell-wise error is not*  
 406 *affected by the number of bootstrap samples since it does not depend directly on this parameter to*  
 407 *estimate the null (left). Using maximum statistics and cluster-mass distribution estimates shows a stronger*  
 408 *dependency on the number of bootstrap estimates, with results stable after 800 to 1000 bootstraps. The*  
 409 *bottom row shows error density maps (sum of errors out of 27000 null maps). The cell-wise error (i.e. no*  
 410 *correction for multiple comparisons) shows that errors accumulate, with some channels showing many*  
 411 *consecutive time frames with 5% error. By contrast, maximum statistics (middle) and the maximum*  
 412 *cluster-masses (right) do not show this effect (maxima at 0.05% and 0.9%), suggesting little to no spatial*  
 413 *bias in sampling (note the very different density scales for the three measures).*



414 *Performance evaluation at the group level*

415  
 416 Repeated measures ANOVAs using parameter estimates from each method revealed 2 spatial-  
 417 temporal clusters for the face effect for both WLS and IRLS, but only the 1st cluster was declared  
 418 statistically significant using OLS (table 2). The expected results (Wakeman & Henson, 2015) with  
 419 full faces having stronger N170 responses than scrambled faces are replicated for all approaches  
 420 (start of cluster 1). Maximum differences were observed over the N170 only when using OLS  
 421 parameters. Using WLS and IRLS gave maxima much later (P280), a result also observed when  
 422 using TFCE rather than spatial-temporal clustering. In each case, a repetition effect was also  
 423 observed in a much more consistent way among methods with the second presentation of stimuli  
 424 differing from the 1st and 3rd presentations (figure 7).  
 425

|                   | OLS                                                            | WLS                                                              | IRLS                                                           |
|-------------------|----------------------------------------------------------------|------------------------------------------------------------------|----------------------------------------------------------------|
| Face effect       |                                                                |                                                                  |                                                                |
| cluster 1         | 140ms to 504ms,<br>max=74, p=0.002 at<br>184ms channel EEG049  | 140ms to 424ms,<br>max=64, p= 0.002 at<br>280ms channel EEG017   | 136ms to 432ms,<br>max=74, p= 0.002 at<br>292ms channel EEG006 |
| cluster 2         |                                                                | 440ms to 648ms,<br>max=17.6, p= 0.032 at<br>616ms channel EEG057 | 520ms to 648ms,<br>max=22, p= 0.032 at<br>636ms channel EEG055 |
| TFCE              | max=74, p=0.026<br>at 184ms channel<br>EEG049                  | max=64, p=0.012<br>at 280ms channel<br>EEG017                    | max=74, p=0.012<br>at 292ms channel<br>EEG006                  |
| Repetition effect |                                                                |                                                                  |                                                                |
| cluster 1         | 232ms to 648ms,<br>max=50, p= 0.001 at<br>588ms channel EEG057 | 232ms to 648ms,<br>max=51, p= 0.001 at<br>612ms channel EEG045   | 236ms to 648ms,<br>max=52, p= 0.001 at<br>588ms channel EEG057 |
| TFCE              | max=50, p=0.002<br>at 588ms channel<br>EEG057                  | max=51, p= 0.001 at<br>612ms channel EEG045                      | max=52, p= 0.001 at<br>588ms channel EEG057                    |

426 *Table 2: Face and repetition effects results using cluster-mass correction and TFCE for each of the three*  
 427 *methods.*

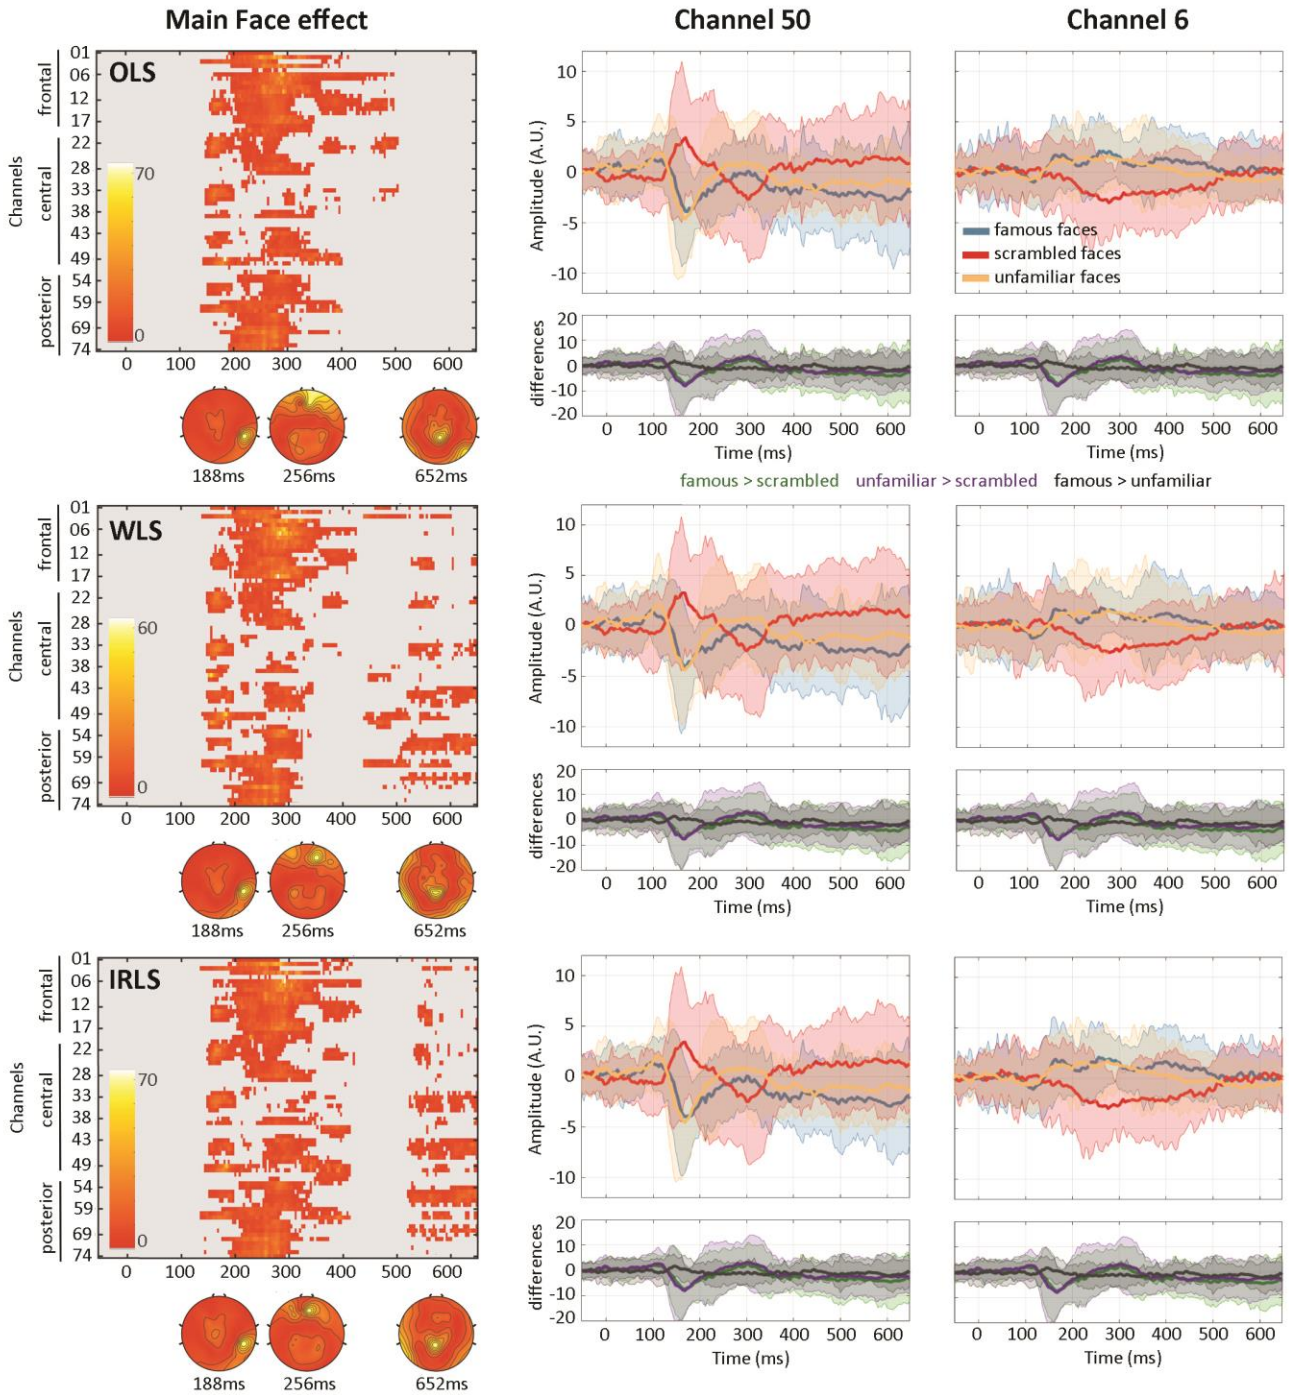

428

429 *Figure 7. Main Face effects observed using OLS, WLS or IRLS 1st level derived parameters. The left*  
 430 *column shows the full channels \* times thresholded maps using cluster-mass correction for*  
 431 *multiple comparisons ( $p < .05$ ). Topographies are plotted at three local maxima. The middle and*  
 432 *right columns show time courses of the mean parameter estimates per condition (blue, red,*  
 433 *orange) and condition differences (green, purple, black) over channel 50 (right inferior-temporal)*  
 434 *and channel 6 (middle anterior frontal).*

435 The statistical maps show that group results using based on WLS parameter estimates lead to  
 436 smaller F values than those obtained from OLS or IRLS estimates (note the difference in maxima  
 437 table 1 and scale in Figure 7), which is confirmed by the median differences in Hotelling  $T^2$  values  
 438 (supplementary tables 2, 3 & table 3). Considering uncorrected p-values, this translates into  
 439 weaker statistical power for WLS: Face effect OLS = 34% of significant data frames, WLS = 31%,  
 440 IRLS = 34%, Repetition effect OLS = 39%, WLS = 35%, IRLS = 39%. Results based on cluster-  
 441 corrected p-values showed however more statistical power for WLS relative to OLS for the Face  
 442 effect (OLS 20% WLS 22% IRLS 25% of significant data frames with cluster mass and 3%, 5% 3%  
 443 of significant data frames with TFCE), and mixed results for the Repetition effect (OLS 31% WLS  
 444 28% IRLS 31% of significant data frames with cluster mass and 7%, 8% 7% of significant data  
 445 frames with TFCE).

446  
 447 To further understand how cluster-based results lead to more statistical power for WLS while F  
 448 values are smaller, we compared distributions' shapes by comparing the deciles of normalized  
 449 values (figure 8). For the face effect, WLS did not differ significantly from OLS or from IRLS for F-  
 450 values, while TFCE values were significantly larger, from the 2nd decile onward when compared  
 451 to OLS, and for deciles 2, 3, 4, 7, 8 and 9 compared to IRLS. For the repetition effect, WLS differed  
 452 from OLS on deciles 2, 7, 8 and 9 for both F-values and TFCE values while it differed from IRLS on  
 453 decile 9 only when looking at F-values, and deciles 2, 5, 8 and 9 when looking at TFCE values.  
 454 Finally, for the interaction effect, WLS did not differ from OLS or IRLS in terms of F-values but had  
 455 significantly weaker TFCE values than OLS (deciles 1, 3, 6, 7, 8 and 9) and IRLS (all deciles but the  
 456 4th). In summary, for the significant main face effect and repetition effect, a general pattern of  
 457 more right skewed distributions of F-values and TFCE-values for WLS than for OLS and IRLS was  
 458 observed while a shorter tail was observed for the non significant interaction effect.

459

|             | face effect         | repetition effect   | interaction effect  |
|-------------|---------------------|---------------------|---------------------|
| WLS vs OLS  | -0.32 [-0.36 -0.28] | -0.54 [-0.59 -0.48] | -0.21 [-0.29 -0.13] |
| WLS vs IRLS | -0.34 [-0.39 -0.30] | -0.53 [-0.58 -0.48] | -0.14 -0.21 -0.08]  |

460 *Table 3. Median differences in Hotelling  $T^2$  values for each effect tested with percentile*  
 461 *bootstrap 95% confidence intervals ( $p=0.001$ ).*

462

|                         |                                          | OLS                    | WLS                    | IRLS                   |
|-------------------------|------------------------------------------|------------------------|------------------------|------------------------|
| Cluster 1<br>Channel 50 | Famous Faces vs.<br>Scrambled            | -4.93<br>[-12.2 2.32]  | -4.52<br>[-11.39 2.34] | -5.82<br>[-12.76 1.11] |
|                         | Unfamiliar Faces vs.<br>Scrambled        | -4.77<br>[-12.42 2.86] | -4.64<br>[-13.02 3.72] | -5.19<br>[-11.93 1.54] |
|                         | Famous vs Unfamiliar<br>Faces            | -0.15<br>[-3.13 2.81]  | 0.12<br>[-3.28 3.53]   | -0.62<br>[-4.86 3.60]  |
| Cluster 1<br>Channel 6  | Famous Faces vs.<br>Scrambled            | 2<br>[-5.25 9.25]      | 1.71<br>[-5.16 8.59]   | 1.68<br>[-6.05 9.41]   |
|                         | Unfamiliar Famous Faces<br>vs. Scrambled | 3.21<br>[-5.80 12.22]  | 2.20<br>[-5.97 10.38]  | 2.95<br>[-6.08 11.99]  |
|                         | Famous vs Unfamiliar<br>Faces            | -1.20<br>[-5.72 3.30]  | -0.49<br>[-5.03 4.04]  | -1.27<br>[-5.47 2.93]  |
| Cluster 2<br>Channel 50 | Famous Faces vs.<br>Scrambled            | -4<br>[-13.82 5.82]    | -4.11<br>[-15.62 7.40] | -4.04<br>[-13.31 5.23] |
|                         | Unfamiliar Faces vs.<br>Scrambled        | -2.16<br>[-9.20 4.87]  | -2.17<br>[-9.83 5.48]  | -2.32<br>[-8.96 4.31]  |
|                         | Famous vs Unfamiliar<br>Faces            | -1.83<br>[-6.47 2.81]  | -1.93<br>[-9.76 5.88]  | -1.71<br>[-7.47 4.03]  |

463 *Supplementary table 2. Pairwise differences in mean parameter estimates (arbitrary unit) measured at*  
 464 *channel 50 and 6 at the maximum of the famous faces responses.*  
 465

|                    |      | medianT | maxT   | medianF | maxF  | medianCluster | maxCluster | medianTFCE | maxTFCE  |
|--------------------|------|---------|--------|---------|-------|---------------|------------|------------|----------|
| Face effect        | OLS  | 4.44    | 157.64 | 2.09    | 74.19 | 72.57         | 22591.41   | 130.41     | 40992.1  |
|                    | WLS  | 3.98    | 136.27 | 1.87    | 64.13 | 64.29         | 19453.52   | 85.72      | 35828.8  |
|                    | IRLS | 4.49    | 157.77 | 2.11    | 74.25 | 34.41         | 23300.19   | 130.88     | 54888.48 |
| Repetition Effect  | OLS  | 5.38    | 107.03 | 2.53    | 50.37 | 35.25         | 39116.91   | 244.38     | 82143.67 |
|                    | WLS  | 4.46    | 109.14 | 2.1     | 51.36 | 33.76         | 33979.02   | 129.89     | 76244.1  |
|                    | IRLS | 5.32    | 110.86 | 2.5     | 52.17 | 37.31         | 39870.66   | 212.27     | 98429.06 |
| Interaction Effect | OLS  | 5.45    | 126.31 | 1.12    | 26.01 | 23.79         | 387.94     | 27.64      | 483.46   |
|                    | WLS  | 5.17    | 78.15  | 1.06    | 16.09 | 21.14         | 317.38     | 25.69      | 470.1    |
|                    | IRLS | 5.32    | 135.67 | 1.09    | 27.93 | 30.57         | 283.44     | 22.9       | 366.41   |

466 *Supplementary table 3. Medians and maxima of the Hotelling T<sup>2</sup>, F-values, Cluster-mass and TFCE scores*  
 467 *for each effect of the ANOVA and methods used at the 1st level.*  
 468

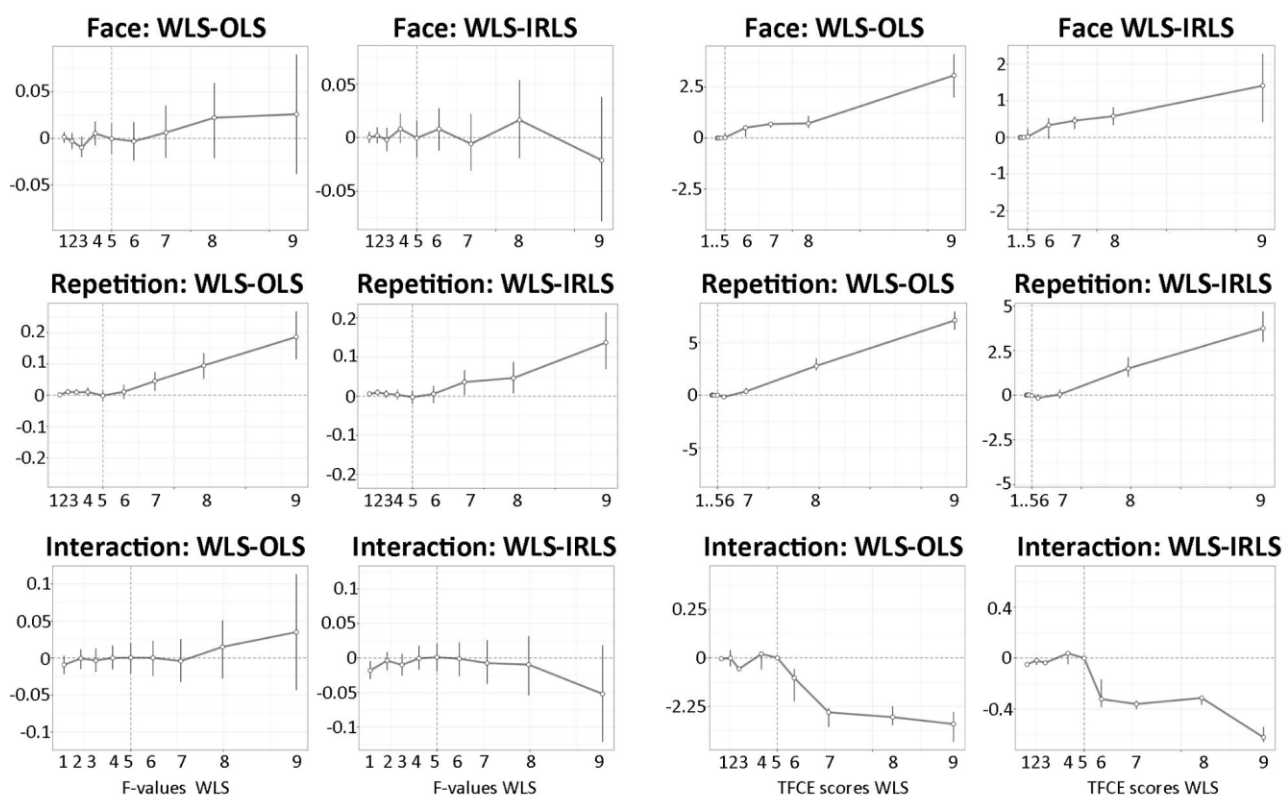

469 *Figure 8. Comparisons of the deciles of standardized F-value (1st and 2nd column) and TFCE value (3rd and*  
 470 *4th column) distributions. Comparisons were done independently for the face effect, the repetition effect*  
 471 *and their interaction.*  
 472



## 473 Discussion

474  
475 Simulation and data-driven results indicate that the proposed WLS-PCP method is efficient at  
476 down weighting trials with dynamics differing from the bulk, leading to more accurate estimates.  
477 Results show that, for ERP, deriving weights based on the temporal profile provides a robust  
478 solution against white noise or uncontrolled oscillations. For biological (pink) noise and amplitude  
479 variations which do not alter the temporal profile, the PCP algorithm does not classify well outlier  
480 trials, leading to a decrease in detection performance compared with white, alpha or gamma  
481 noise. Rather than a defect, we see this as biologically relevant (see below). Importantly, even in  
482 those cases of failed detection, the overall correlations with the ground truth remained high  
483 ( $\geq 0.99$ ). When analyzing real data, differences in amplitude variations were nevertheless  
484 captured by the PCP/WLS approach, with amplitude variations related to trials which were out  
485 of phase with the bulk of the data.

486  
487 Group-level analyses of the face dataset replicated the main effect of face type (faces>scrambled)  
488 in a cluster from  $\sim 150$ ms to  $\sim 350$ ms but also revealed a late effect ( $>500$ ms), observed when  
489 using WLS and IRLS parameter estimates but absent when using OLS parameter estimates.  
490 Despite more data frames declared significant with WLS than OLS, effects sizes were smaller for  
491 WLS than for OLS and IRLS. The shape of the F distributions when using WLS parameter estimates  
492 were however more right skewed than when using OLS or IRLS, leading cluster corrections to  
493 declare more data points as significant. Indeed, under the null, very similar distributions of  
494 maxima are observed for the three methods leading to more power for the more skewed  
495 observed distributions. The interplay between 1st level regularization, 2nd level effect size, and  
496 multiple comparison procedures depends on many parameters and it is not entirely clear how  
497 statistical power is affected by their combination and requires deeper investigation via  
498 simulations. Empirically, we can nevertheless conclude that group results were statistically more  
499 powerful using robust approaches at the subject level than when using OLS.

500  
501 Using the trial dynamics (temporal or spectral profile) to derive a single weight per trial makes  
502 sense, not just because the observed signal is autocorrelated, but also because it is biologically  
503 relevant. Let's consider first the signal plus noise model of ERP generation (Hillyard, 1985; Jervis  
504 et al., 1983; Shah, 2004). In this conceptualization, ERPs are time-locked additive events running  
505 on top of background activity. An outlier time frame for a given trial may occur if 1) the evoked  
506 amplitude deviates from the bulk of evoked trials, or 2) the background activity deviates from  
507 the rest of the background activity. In the former case, the additional signal may be conceived  
508 either as a single process (a chain of neural events at a particular location) or a mixture of  
509 processes (multiple, coordinated neural events). In both cases, the data generating process is  
510 thought to be evolving over time (auto-regressive) which speaks against flagging or weighting a  
511 strong deviation at a particular time frame only. It is likely that several consecutive time frames  
512 deviate from most other trials, even though only one time frame is deemed an outlier. In the case  
513 of a deviation in background activity, it would mean that for an extremely brief period, a large  
514 number of neurons synchronized for non-experimentally related reasons, and for this trial only.  
515 Although we do not contend that such events cannot happen in general, this would mean that,  
516 in the context of ERP outlier detection, the background activity varies by an amount several folds

517 bigger than the signal, which goes against theory and observations. Let now us consider the phase  
518 resetting model (Makeig et al., 2002; Sayers et al., 1974). In this model, ERPs are emerging from  
519 phase synchronization among trials, due to stimulus induced phase-resetting of background  
520 activity. If a trial deviates from the rest of the trials, this implies that it is out-of-phase. In this  
521 scenario, deriving different weights for different time frames (i.e. IRLS solution) means that the  
522 time course is seen as an alternation of normal and outlying time frames, which has no  
523 meaningful physiological interpretation. Thus, irrespective of the data generating model, the WLS  
524 approach seems biologically more appropriate than the IRLS method.

525  
526 In conclusion, we propose a fast and straightforward weighting scheme for trials based on their  
527 temporal or spectral profiles. Results indicate that it captures and attenuates well ERP noise,  
528 leading to increased estimation precision and possibly increased statistical power at the group  
529 level.

530

### 531 **Acknowledgements**

532  
533 Thank you to EEGLAB/LIMO MEEG users who engaged with the beta version, got stuck but  
534 persevered until we solved their issues.

535

### 536 **References**

- 537  
538 Christensen, R. (2002). *Plane Answers to Complex Questions. The theory of Linear Models*. (3rd  
539 ed.). Springer.
- 540 Delorme, A., & Makeig, S. (2004). EEGLAB: An open source toolbox for analysis of single-trial EEG  
541 dynamics including independent component analysis. *Journal of Neuroscience Methods*,  
542 *134*(1), 9–21. <https://doi.org/10.1016/j.jneumeth.2003.10.009>
- 543 Filzmoser, P., Maronna, R., & Werner, M. (2008). Outlier identification in high dimensions.  
544 *Computational Statistics & Data Analysis*, *52*(3), 1694–1711.
- 545 Hillyard, S. A. (1985). Electrophysiology of human selective attention. *Trends in Neurosciences*, *8*,  
546 400–405. [https://doi.org/10.1016/0166-2236\(85\)90142-0](https://doi.org/10.1016/0166-2236(85)90142-0)
- 547 Hochberg, Y. (1988). A Sharper Bonferroni Procedure for Multiple Tests of Significance.  
548 *Biometrika*. *75* (4): 800–802
- 549 Hoaglin, D. C., & Welsch, R. E. (1978). The Hat Matrix in Regression and ANOVA. *The American*  
550 *Statistician*, *32*(1), 17–22. <https://doi.org/10.2307/2683469>
- 551 Jervis, B. W., Nichols, M. J., Johnson, T. E., Allen, E., & Hudson, N. R. (1983). A Fundamental  
552 Investigation of the Composition of Auditory Evoked Potentials. *Biomedical Engineering,*  
553 *IEEE Transactions On, BME-30*(1), 43–50. <https://doi.org/10.1109/TBME.1983.325165>
- 554 Kothe, C. A., & Makeig, S. (2013). BCILAB: A platform for brain-computer interface development.  
555 *Journal of Neural Engineering*, *10*(5), 056014. [https://doi.org/10.1088/1741-](https://doi.org/10.1088/1741-2560/10/5/056014)  
556 [2560/10/5/056014](https://doi.org/10.1088/1741-2560/10/5/056014)
- 557 Makeig, S., Westerfield, M., Jung, T-P., Enghoff, S., Townsend, J., Courchesne, E., & Sejnowski,  
558 T.J. (2002). Dynamic Brain Sources of Visual Evoked Responses. *Science*, *295*(5555), 690–  
559 694.
- 560 Maris, E. & Oostenveld, R. (2007). Nonparametric statistical testing of EEG- and MEG-data.

- 561 *Journal of Neuroscience Methods*, 164(1), 177–190.
- 562 Onton, J., Westerfield, M., Townsend, J., & Makeig, S. (2006). Imaging human EEG dynamics using  
563 independent component analysis. *Neuroscience & Biobehavioral Reviews*, 30(6), 808–  
564 822. <https://doi.org/10.1016/j.neubiorev.2006.06.007>
- 565 Pernet, C.R., Latinus, M., Nichols, T. E., & Rousselet, G. A. (2015). Cluster-based computational  
566 methods for mass univariate analyses of event-related brain potentials/fields: A  
567 simulation study. *Journal of Neuroscience Methods*, 250, 85–93.  
568 <https://doi.org/10.1016/j.jneumeth.2014.08.003>
- 569 Pernet, C.R., Appelhoff, S., Gorgolewski, K. J., Flandin, G., Phillips, C., Delorme, A., & Oostenveld,  
570 R. (2019). EEG-BIDS, an extension to the brain imaging data structure for  
571 electroencephalography. *Scientific Data*, 6(1), 103. [https://doi.org/10.1038/s41597-019-](https://doi.org/10.1038/s41597-019-0104-8)  
572 0104-8
- 573 Pernet, C.R., Chauveau, N., Gaspar, C., & Rousselet, G. A. (2011). LIMO EEG: A Toolbox for  
574 Hierarchical Linear Modeling of ElectroEncephaloGraphic Data. *Computational*  
575 *Intelligence and Neuroscience*, 2011, 1–11. <https://doi.org/10.1155/2011/831409>
- 576 Pernet, C.R., Martinez-Cancino, R., Truong, D., Makeig, S., & Delorme, A. (2021). From BIDS-  
577 Formatted EEG Data to Sensor-Space Group Results: A Fully Reproducible Workflow With  
578 EEGLAB and LIMO EEG. *Frontiers in Neuroscience*, 14, 610388.  
579 <https://doi.org/10.3389/fnins.2020.610388>
- 580 Pion-Tonachini, L., Kreutz-Delgado, K., & Makeig, S. (2019). The ICLabel dataset of  
581 electroencephalographic (EEG) independent component (IC) features. *Data in Brief*, 25,  
582 104101. <https://doi.org/10.1016/j.dib.2019.104101>
- 583 Sayers, B. MCA., Beagley, H. A., & Henshall, W. R. (1974). The Mechanism of Auditory Evoked EEG  
584 Responses. *Nature*, 247(5441), 481–483. <https://doi.org/10.1038/247481a0>
- 585 Shah, A. S. (2004). Neural Dynamics and the Fundamental Mechanisms of Event-related Brain  
586 Potentials. *Cerebral Cortex*, 14(5), 476–483. <https://doi.org/10.1093/cercor/bhh009>
- 587 Yeung, N., Bogacz, R., Holroyd, C., Nieuwenhuis, S., & Cohen, J. (2018). *Simulated EEG data*  
588 *generator* [Matlab]. <https://data.mrc.ox.ac.uk/data-set/simulated-eeg-data-generator>
